# Supplementary material for: Circulating miR-223 in Oral Cancer: Its Potential as a Novel Diagnostic Biomarker and Therapeutic Target
Source: PubMed Central journal article supplement (PMC4956265; doi:10.1371/journal.pone.0159693), 2016-07-21
Supplement: pone.0159693.s001.pdf [file pone.0159693.s001.pdf]

## Migration Assay

---

Pre-miR-NC

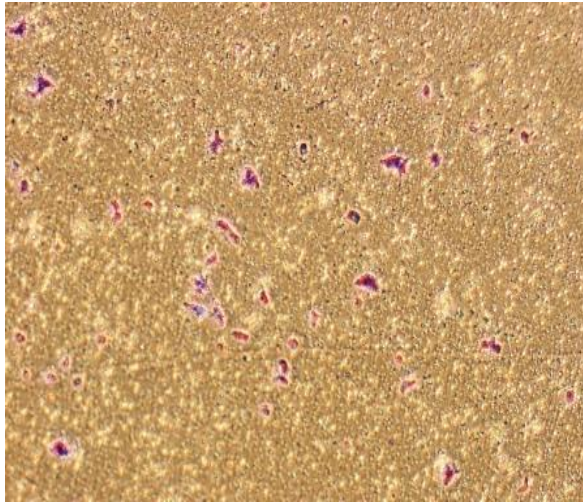

Pre-miR-223

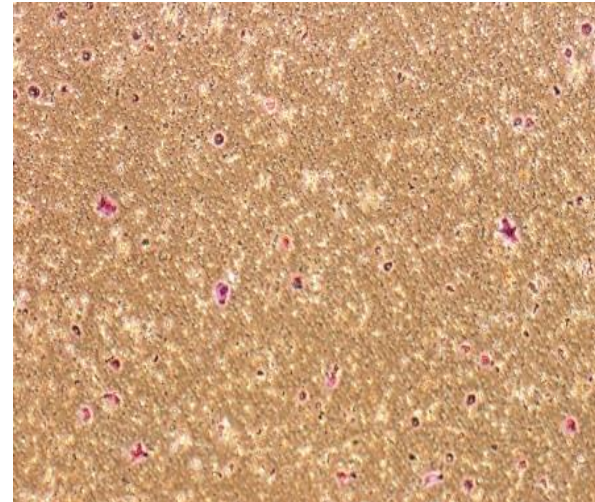

**S1 Fig. Migration assay of Pre-miR-223- or Pre-miR-NC- transfected Ca9-22 cells.**
